# Supplementary material for: Data storage using peptide sequences
Source: PubMed Central journal article supplement (PMC8277807; doi:10.1038/s41467-021-24496-9), 2021-07-13
Supplement: 41467_2021_24496_MOESM3_ESM.pdf [file 41467_2021_24496_MOESM3_ESM.pdf]

### **Description of Additional Supplementary Files**

File Name: Supplementary Audio 1

Description: The music "Silent Night"
